# Supplementary material for: Heat-triggered high-performance thermocells enable a self-powered forest fire alarm
Source: Royal Society of Chemistry journal article supplement (doi:10.1039/d1ta06793a), 2021-01-01
Supplement: d1ta06793a1.pdf [file d1ta06793a1.pdf]

## Electronic Supplementary Information (ESI)

### **Heat-triggered high-performance thermocells enable self-powered forest fire alarming**

Boyang Yu, Wei Yang, Jia Li, Wenke Xie, Hongrun Jin, Rong Liu, Hui Wang, Xinyan Zhuang, Bei Qi, Shiyu Liu, Liang Huang, Bin Hu, Jiangjiang Duan\* and Jun Zhou\*

Wuhan National Laboratory for Optoelectronics, Huazhong University of Science and Technology, Wuhan 430074, China.

\*Correspondence to: [jiangjduan@hust.edu.cn](mailto:jiangjduan@hust.edu.cn) and [jun.zhou@mail.hust.edu.cn](mailto:jun.zhou@mail.hust.edu.cn)

#### **This PDF file includes:**

Supplementary Note 1

Figures S1 to S11

Table S1

Captions for Videos S1 to S4

Supplementary References

#### **Other Supplementary Information for this manuscript include the following:**

Videos S1 to S4

## Supplementary Note 1. Theoretical analysis of the thermocell

For a thermocell (TC) using  $\text{Fe}(\text{CN})_6^{3-}/\text{Fe}(\text{CN})_6^{4-}$  aqueous electrolyte ( $\text{Fe}(\text{CN})_6^{3-} + e^- \leftrightarrow \text{Fe}(\text{CN})_6^{4-}$ ), a potential difference ( $\Delta E$ ) can be generated between two electrodes by applied a temperature difference ( $\Delta T$ ), due to the dependence electrical redox potential ( $E$ ) on temperature (generally named thermopower for the TC).<sup>1,2</sup> According to the Nernst equation, the electrical redox potential ( $E$ ) of the abovementioned redox reaction can be expressed as:

$$E = E^0 + \frac{RT}{F} \ln \frac{(\alpha_{\text{Fe}(\text{CN})_6^{3-}})}{(\alpha_{\text{Fe}(\text{CN})_6^{4-}})} \quad (\text{S1})$$

where  $E^0$  is the standard potential,  $\alpha$  is the activity of redox specie,  $R$  is the ideal gas constant, and  $F$  is Faraday's constant. The activity ( $\alpha$ ) is defined as the product of the activity coefficient ( $\gamma$ ) and concentration ( $c$ ) ( $\alpha = \gamma \times c$ ). Thus, Eq. (S1) can be expressed as:

$$E = E^0 + \frac{RT}{F} \left[ \ln \frac{(\gamma_{\text{Fe}(\text{CN})_6^{3-}})}{(\gamma_{\text{Fe}(\text{CN})_6^{4-}})} + \ln \frac{(c_{\text{Fe}(\text{CN})_6^{3-}})}{(c_{\text{Fe}(\text{CN})_6^{4-}})} \right] \quad (\text{S2})$$

The open-circuit voltage ( $V_{oc}$ ) of TC is generated by the difference of  $E$  for the cold ( $E_{cold}$ ) and the hot sides ( $E_{hot}$ ), and thereby can be calculated by:

$$V_{oc} = \frac{R}{F} \left[ T_{cold} \ln \frac{(\gamma_{\text{Fe}(\text{CN})_6^{3-}})_{cold}}{(\gamma_{\text{Fe}(\text{CN})_6^{4-}})_{cold}} + T_{hot} \ln \frac{(\gamma_{\text{Fe}(\text{CN})_6^{4-}})_{hot}}{(\gamma_{\text{Fe}(\text{CN})_6^{3-}})_{hot}} \right] + \frac{R}{F} \left[ T_{cold} \ln \frac{(c_{\text{Fe}(\text{CN})_6^{3-}})_{cold}}{(c_{\text{Fe}(\text{CN})_6^{4-}})_{cold}} + T_{hot} \ln \frac{(c_{\text{Fe}(\text{CN})_6^{4-}})_{hot}}{(c_{\text{Fe}(\text{CN})_6^{3-}})_{hot}} \right] \quad (\text{S3})$$

whereas the first term containing the activity coefficient ( $\gamma$ ) is considered to be dominated by the solvent-dependent difference in entropy between the redox species, the second term is only related to the concentration ratio of the redox species.<sup>3,4</sup> Here, we define the solvent-dependent entropy difference ( $\Delta S$ ) and the concentration ratio difference ( $\Delta C$ ) as:

$$\Delta S = \left[ T_{cold} \ln \frac{(Y_{Fe(CN)_6^{3-}})_{cold}}{(Y_{Fe(CN)_6^{4-}})_{cold}} + T_{hot} \ln \frac{(Y_{Fe(CN)_6^{4-}})_{hot}}{(Y_{Fe(CN)_6^{3-}})_{hot}} \right] \times \frac{R}{\Delta T} \quad (S4)$$

$$\Delta C = \left[ T_{cold} \ln \frac{(c_{Fe(CN)_6^{3-}})_{cold}}{(c_{Fe(CN)_6^{4-}})_{cold}} + T_{hot} \ln \frac{(c_{Fe(CN)_6^{4-}})_{hot}}{(c_{Fe(CN)_6^{3-}})_{hot}} \right] \times \frac{R}{\Delta T} \quad (S5)$$

Therefore, the Eq. (S3) can be simplified as:

$$V_{oc} = \frac{(\Delta S + \Delta C)}{F} \times \Delta T \quad (S6)$$

For the typical equal-concentration  $Fe(CN)_6^{3-}/Fe(CN)_6^{4-}$  system (TC), both the concentration ratios of  $Fe(CN)_6^{3-}$  and  $Fe(CN)_6^{4-}$  on the hot and the cold sides equal 1 under open-circuit state, obviously causing  $\Delta C=0$ . Therefore, the  $V_{oc}$  of such TC is only distributed by  $\Delta S$ :

$$V_{oc} = \frac{\Delta S}{F} \times \Delta T \quad (S7)$$

And the  $V_{oc}$  also can be calculated by the product of thermopower and  $\Delta T$ .<sup>5,6</sup> Early studies consistently showed that the thermopower slightly depended on the concentration of  $Fe(CN)_6^{3-}/Fe(CN)_6^{4-}$ , nearly a constant  $\sim 1.4 \text{ mV K}^{-1}$ .<sup>7,8</sup> Such result is also proven by our measured  $V_{oc}$  profile of a pristine TC (Fig. 1b).

By approximately using thermopower of  $1.4 \text{ mV K}^{-1}$ , Eq. (S3) can be further written as:

$$V_{oc} = \left( 1.4 + \frac{\Delta C}{F} \right) \times \Delta T \quad (S8)$$

Remarkably, the  $V_{oc}$  of TC can be highly boosted by simultaneously introducing the concentration gradients of  $Fe(CN)_6^{3-}/Fe(CN)_6^{4-}$  on the cold side ( $Fe(CN)_6^{3-} \gg Fe(CN)_6^{4-}$ ) and the hot side ( $Fe(CN)_6^{4-} \gg Fe(CN)_6^{3-}$ ). Here, we named such a hypothetical TC as concentration gradient-boosted thermocell (TCC) and the contribution of concentration gradients as CG (the second term of Eq. (S8)). Based on Eq. (S8), we simulated the  $V_{oc}$  of a TCC with both the concentration ratios of  $Fe(CN)_6^{3-}/Fe(CN)_6^{4-}$  on the cold side and  $Fe(CN)_6^{4-}/Fe(CN)_6^{3-}$  on the hot side set as 1000 (Fig. 1b and Fig. S1).

## Supplementary Figures

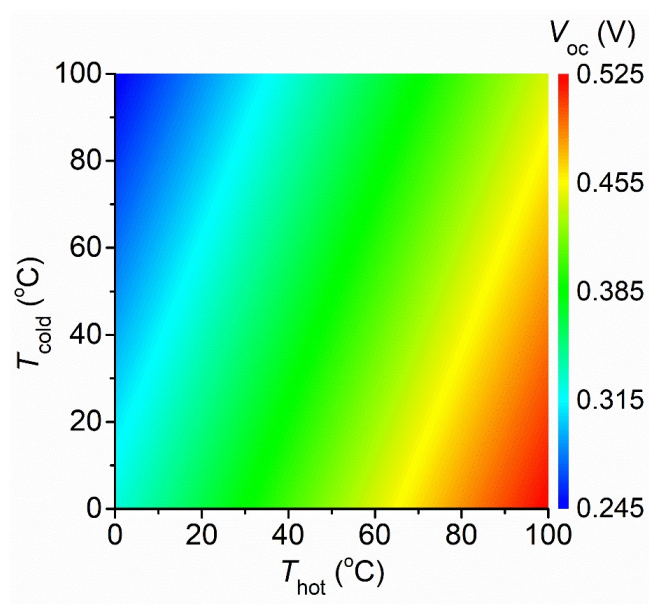

**Figure S1.** Simulated  $V_{oc}$  of the TCC depending on the temperature of the cold and the hot electrodes. Both the concentration ratios of  $\text{Fe}(\text{CN})_6^{4-}/\text{Fe}(\text{CN})_6^{3-}$  on the hot side and  $\text{Fe}(\text{CN})_6^{3-}/\text{Fe}(\text{CN})_6^{4-}$  on the cold side were preset as 1000. The simulation is based on theoretical analysis (Supplementary Note 1).

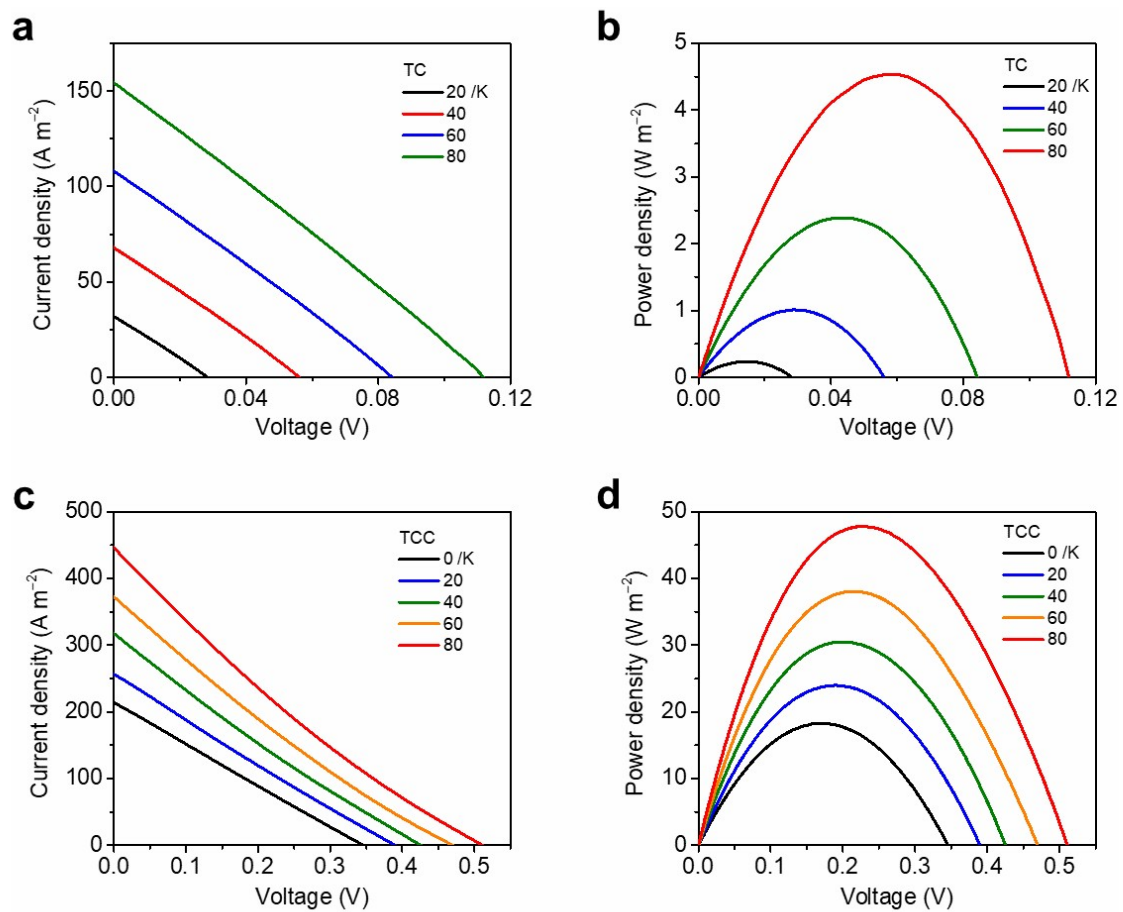

**Figure S2.** (a, c) Current–voltage curves for the TC and TCC at different  $\Delta T$ , and their corresponding power densities (b, d). The output of TCC at a  $\Delta T$  of 0 K is totally contributed by the introduced concentration gradients.

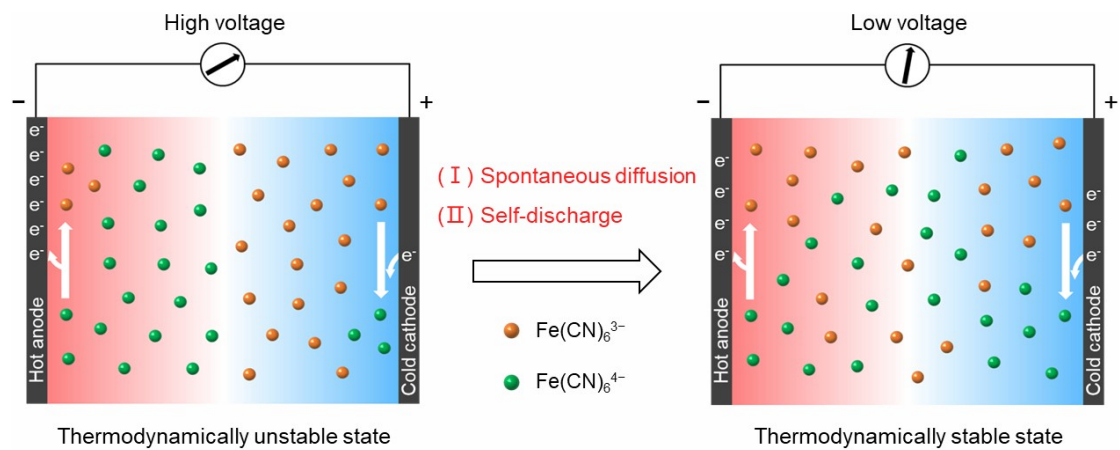

**Figure S3.** Schematic of the TC boosted by a transient concentration gradient (left), which is thermodynamically unstable and will spontaneously decay into a homogeneous and thermodynamically stable state (right).

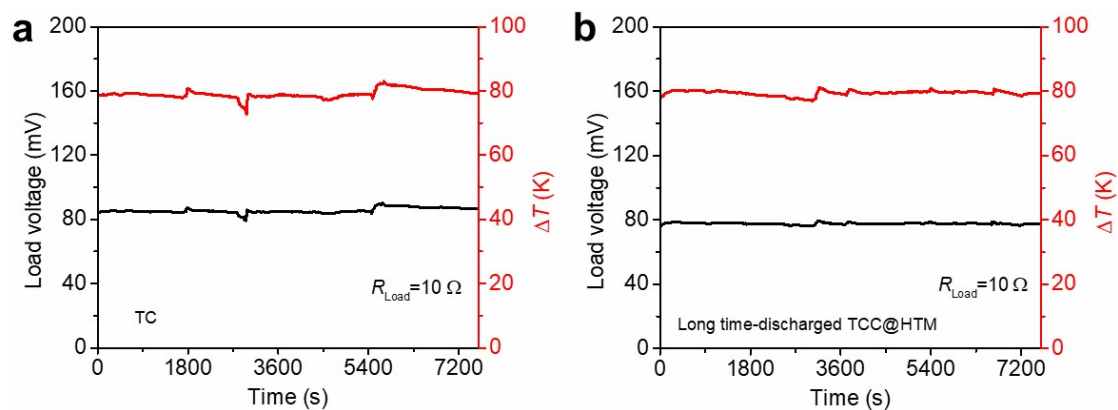

**Figure S4.** Continuous operations of the pristine TC (a) and the long time-discharged TCC (b), discharged with a  $10 \Omega$  load resistance at a  $\Delta T$  of  $\sim 80$  K. The cold side temperature was controlled at  $\sim 291$  K. Here, the “long time-discharged TCC@HTM” represents a TCC in which the concentration gradients have been totally decayed by discharging and a HTM have been used.

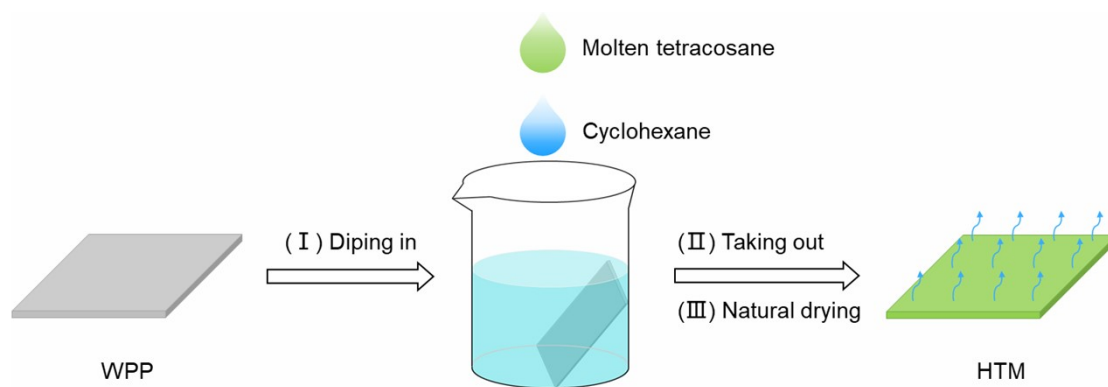

**Figure S5.** Schematic of the process of preparing the heat-triggered membrane (HTM).



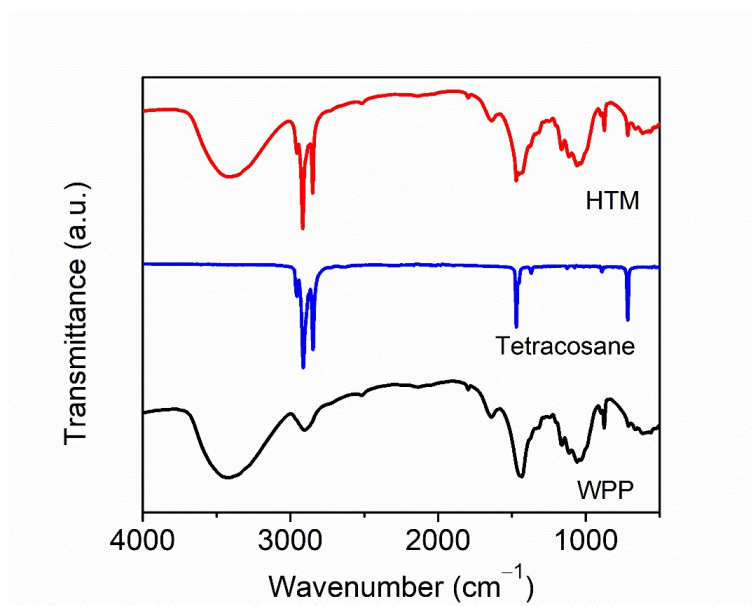

**Figure S6.** FTIR spectra of the HTM composed of the tetracosane and the wood pulp paper (WPP).

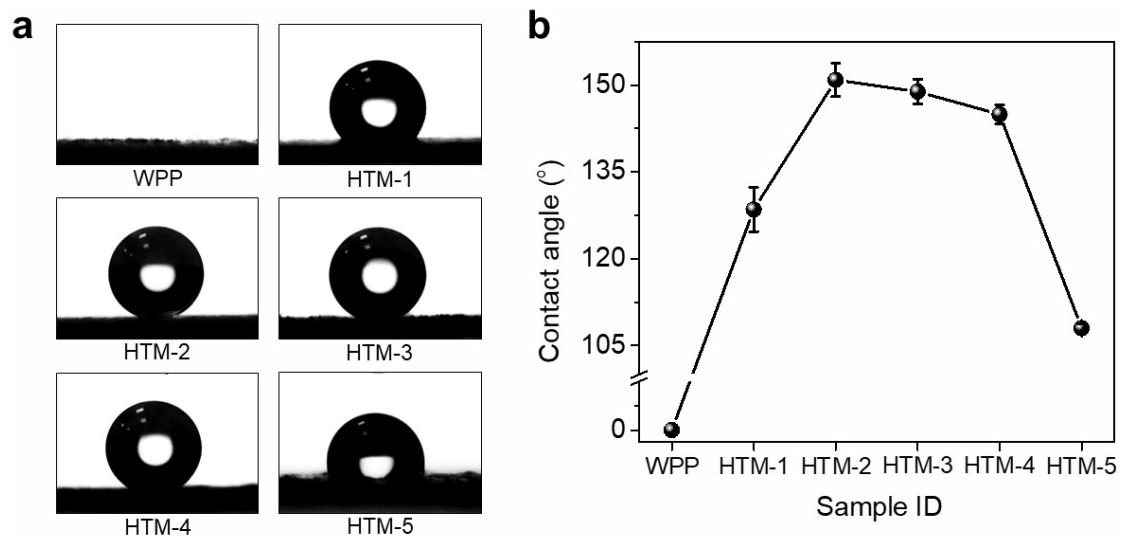

**Figure S7.** (a) Photographs of water drops on the WPP and various HTM samples. (b) Contact angles of the WPP and various HTM samples. Each point is a statistic from five different samples.

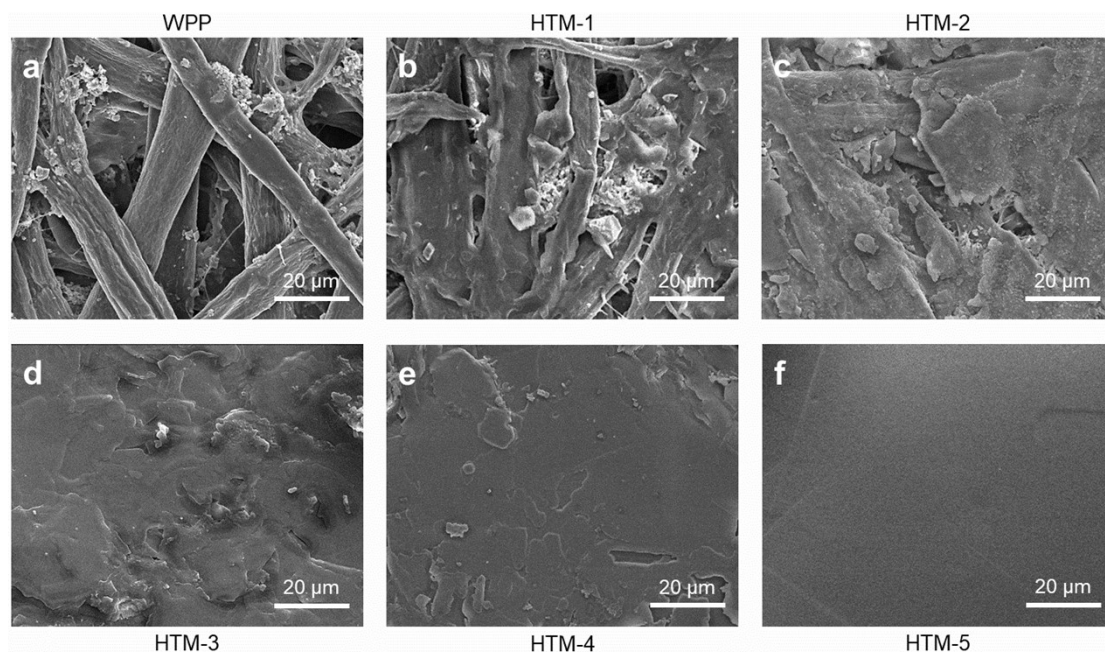

**Figure S8.** SEM images of the WPP and various HTM samples.

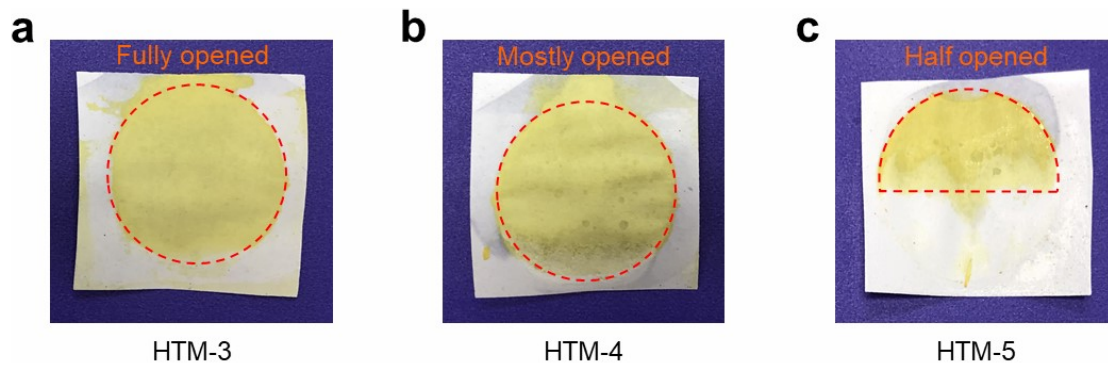

**Figure S9.** Photographs of various HTM samples after the heat-triggered test in Fig. 3d.

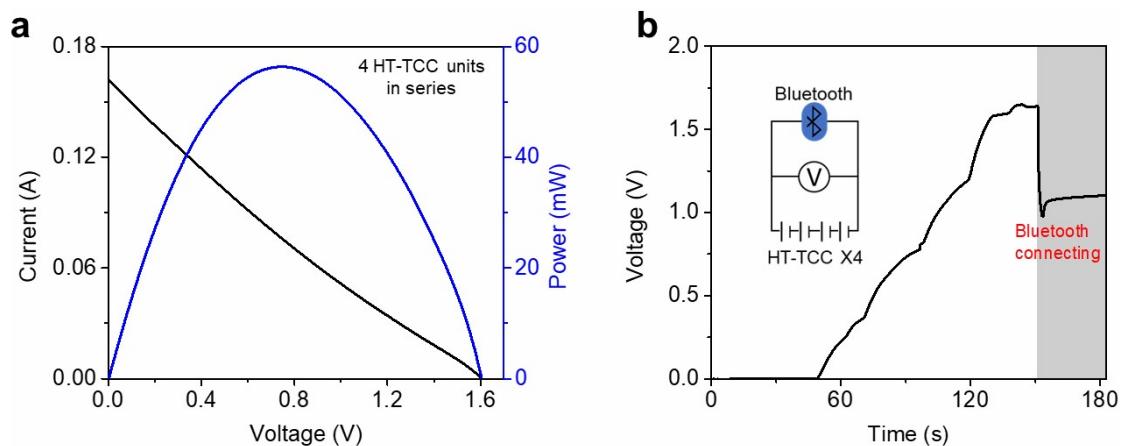

**Figure S10.** (a) Current-voltage curve (black) and corresponding power output (blue) of a HT-TCC module integrated by 4 units in series. The established  $\Delta T$  across the module was  $\sim 35$  K. (b) Real-time voltage curve of the module tested in the simulated precombustion for driving a commercial Bluetooth to connect a mobile phone. The inset shows the operated circuit diagram.

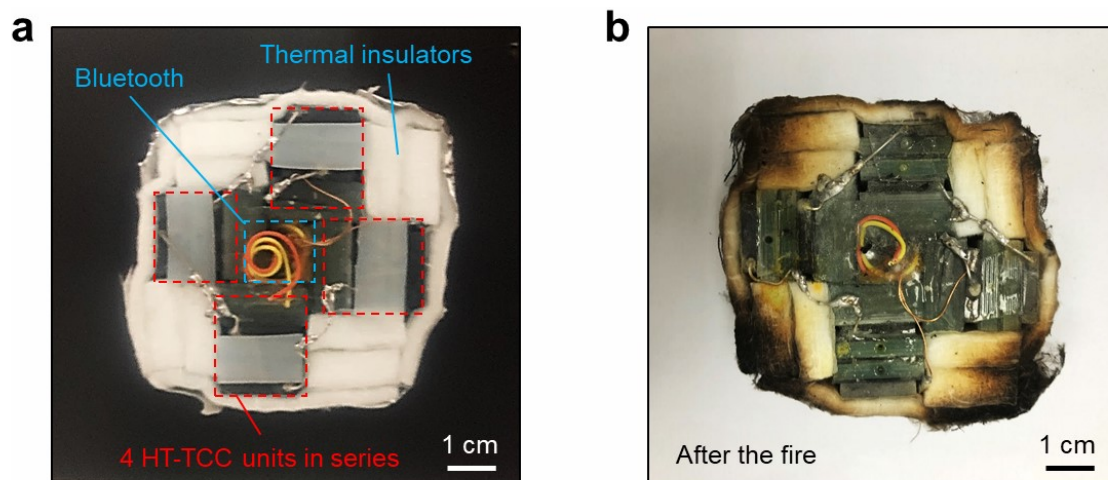

**Figure S11.** (a) Photograph of a prototype device for fire detection and alarm, containing a cube-shaped HT-TCC module and a Bluetooth. (b) Photograph of the device after the open fire test.

### Supplementary Table

**Table S1.** Sample ID of HTM and corresponding volume ratio of tetracosane and cyclohexane used in preparation.

| Simple ID | Volume ratio of tetracosane and cyclohexane<br>(x:y) |
|-----------|------------------------------------------------------|
| HTM-1     | 1:20                                                 |
| HTM-2     | 1:10                                                 |
| HTM-3     | 1:5                                                  |
| HTM-4     | 1:3                                                  |
| HTM-5     | 1:0                                                  |

### **Captions for Videos S1 to S4**

**Video S1.** Dynamic contact angle test of the HTM with heating off and on.

**Video S2.** Dyeing test of the HTM with heating off and on.

**Video S3.** Demonstration of the HT-TCC module for the precombustion detection and alarm.

**Video S4.** Demonstration of the prototype device for the open fire detection and alarm.



## Supplementary References

1. T. I. Quickenden and Y. Mua, *J. Electrochem. Soc.*, 1995, **142**, 3985-3994.
2. M. F. Dupont, D. R. MacFarlane and J. M. Pringle, *Chem. Commun.*, 2017, **53**, 6288-6302.
3. B. Yu, J. Duan, H. Cong, W. Xie, R. Liu, X. Zhuang, H. Wang, B. Qi, M. Xu, Z. L. Wang and J. Zhou, *Science*, 2020, **370**, 342-346.
4. T. Kim, J. S. Lee, G. Lee, H. Yoon, J. Yoon, T. J. Kang and Y. H. Kim, *Nano Energy*, 2017, **31**, 160-167.
5. J. Duan, G. Feng, B. Yu, J. Li, M. Chen, P. Yang, J. Feng, K. Liu and J. Zhou, *Nat. Commun.*, 2018, **9**, 5146.
6. H. Zhou, T. Yamada and N. Kimizuka, *J. Am. Chem. Soc.*, 2016, **138**, 10502-10507.
7. T. J. Kang, S. Fang, M. E. Kozlov, C. S. Haines, N. Li, Y. H. Kim, Y. Chen and R. H. Baughman, *Adv. Funct. Mater.*, 2012, **22**, 477-489.
8. J. H. Kim, J. H. Lee, R. R. Palem, M.-S. Suh, H. H. Lee and T. J. Kang, *Sci. Rep.*, 2019, **9**, 8706.
